# Supplementary material for: Herd immunity and a vaccination game: An experimental study
Source: PubMed Central journal article supplement (PMC7224512; doi:10.1371/journal.pone.0232652), 2020-05-14
Supplement: pone.0232652.s002.pdf [file pone.0232652.s002.pdf]

## S1 Appendix. Model and Predictions

We reproduce the result on  $\pi_P$  from [5] below and we want to highlight the concavity of the infection probability as a function of the vaccination coverage.

**Proposition 1.** [ [5]] *Given any  $P \in [0, 1]$ , there exists a unique  $\pi_P$  that is strictly decreasing and concave in  $P$  until  $P$  reaches the elimination threshold  $P_{crit}$ . Furthermore,  $\pi_P = 1 - \frac{1}{R_0(1-P)}$  for any  $P < P_{crit}$ , and  $\pi_P = 0$  for any  $P \geq P_{crit}$ .*

We now proceed to analyzing the game.

Let  $\sigma_i \in [0, 1]$  denote the probability that player  $i$  chooses vaccination.  $\sigma = (\sigma_1, \dots, \sigma_n)$  denotes a mixed-strategy profile. The expected payoff for player  $i$  from randomization with  $\sigma_i$  can be expressed as follows:

$$EU_i(\sigma_i, \sigma_{-i}) = \frac{u(R)}{\mu} - \sigma_i C - (1 - \sigma_i) d_{R_0} L \mathbb{E}[\pi_P(\sigma)],$$

where  $\mathbb{E}[\pi_P(\sigma)]$  denotes the expected infection probability given the mixed-strategy profile  $\sigma$ .

**Definition 1.** *A strategy profile  $\sigma^* = (\sigma_1^*, \dots, \sigma_n^*) \in [0, 1]^n$  is a totally mixed-strategy Nash equilibrium for the game  $\mathcal{G}$  if we have for any  $i \in \mathcal{N}$*

$$\sigma_i \in (0, 1), \tag{3}$$

and for all  $\sigma_i^* \in [0, 1]$ ,

$$EU_i(\sigma_i^*, \sigma_{-i}^*) \geq EU_i(\sigma_i, \sigma_{-i}^*). \tag{4}$$

In what follows, we shall focus on the case in which  $C \leq \pi_0 d_{R_0} L$ . If  $C > \pi_0 d_{R_0} L$ , the only equilibrium outcome is zero vaccination coverage.

## Characterization of all Nash equilibria

The following proposition characterizes the set of pure-strategy equilibrium outcomes.

**Proposition 2.** *For  $k = 0, 1, \dots, v_{crit} - 1$ ,  $v = k + 1$  is the pure strategy equilibrium outcome for  $\frac{C}{d_{R_0} L} \in (\pi_{k+1}, \pi_k]$ .*

**Proof of Proposition 2.** For any  $i \in V(\mathbf{b})$ , she has no incentive to deviate because  $C \leq d_{R_0} L \pi_k$ ; for any  $i \notin V(\mathbf{b})$ , she has no incentive to deviate because  $C > d_{R_0} L \pi_{k+1}$ .  $v < k + 1$  cannot arise in pure strategy equilibrium because some  $i \notin V(\mathbf{b})$  can always be better off by taking the vaccination.  $v > k + 1$  cannot arise in pure strategy equilibrium because some  $i \in V(\mathbf{b})$  can always be better off by not taking the vaccination. Lastly, note that  $v > v_{crit}$  cannot arise in equilibrium because the infection probability vanishes. ■

We now show a general characterization of all mixed-strategy equilibria. Let  $\mathcal{M}$  be the set of players using mixed strategies, and  $|\mathcal{M}| = m$ . The next proposition characterizes all the mixed-strategy equilibria for  $m > 1$ ,

**Proposition 3.** *Given  $n > R_0$ , for  $m > 1$  and  $v \leq \min\{v_{crit} - 1, n - m\}$ ,  $\langle v, m \rangle$  arises as a mixed strategy equilibrium outcome for  $\frac{C}{d_{R_0}L} \in (\pi_{v+m-1}, \pi_v)$  with  $\sigma = \sigma^*$  and is uniquely determined by*

$$\frac{C}{d_{R_0}L} = \sum_{k=0}^{m-1} \pi_{v+k} \binom{m-1}{k} \sigma^{*k} (1 - \sigma^*)^{m-1-k}. \quad (5)$$

**Proof of Proposition 3.** A mixed-strategy Nash equilibrium requires that every player in  $\mathcal{M}$  is indifferent between vaccination and non-vaccination, i.e.,

$$EU_i(vc, \sigma_{-i}^*) = EU_i(nv, \sigma_{-i}^*) \quad \text{for any } i \in \mathcal{M}. \quad (6)$$

It follows that

$$\frac{1}{\mu} u(R) - C = \frac{1}{\mu} u(S) - d_{R_0} LE[\pi_{P(\sigma)}].$$

where  $\mathbb{E}[\pi_{P(\sigma)}]$  denote the expected infection probability given  $v = k$ . Note that the additional vaccination arising from mixed-strategy follows the Poisson binomial distribution with success probabilities  $\sigma_{-i}$ , we obtain

$$\frac{C}{d_{R_0}L} = \sum_{k=0}^{m-1} \pi_{v+k} \sum_{V \in \mathcal{P}(\mathcal{M}_{-i}; k)} \prod_{j \in V} \sigma_j \prod_{l \in \mathcal{M}_{-i}/V} (1 - \sigma_l) \quad (7)$$

for any  $i \in \mathcal{M}$ . Consider this system of equations (characterizing the indifference conditions for the players in set  $\mathcal{M}$ ) where  $v \leq \min\{v_{crit} - 1, n - m\}$ , we claim that for any mixed strategy equilibria with  $m > 1$ , the mixed-strategy profile  $\sigma$  is unique as shown by the following two lemmas.

**Lemma 1.** *There exists a solution to (7) for  $\frac{C}{d_{R_0}L} \in (\pi_{v+m-1}, \pi_v)$  s.t.  $\sigma_i = \sigma^*$  for any  $i \in \mathcal{M}$ .*

**Proof of Lemma 1.** The system (7) reduces to

$$\frac{C}{d_{R_0}L} = \sum_{k=0}^{m-1} \pi_{v+k} \binom{m-1}{k} \sigma^{*k} (1 - \sigma^*)^{m-1-k}. \quad (8)$$

By intermediate value theorem, there exists  $\sigma^* \in (0, 1)$  such that the above equation holds. ■

**Lemma 2.** *(7) has at most one solution.*

**Proof of Lemma 2.** Define vector-valued function  $H: [0, 1]^n \rightarrow \mathbb{R}^n$  where every

component function

$$H_i := d_{R_0} r \sigma_i \sum_{k=0}^{m-1} \pi_{v+k} \sum_{V \in \mathcal{P}(\mathcal{M}_{-i;k})} \prod_{j \in V} \sigma_j \prod_{l \in \mathcal{M}_{-i}/V} (1 - \sigma_l).$$

It is easy to check that  $H$  is continuously differentiable on  $(0, 1)^n$ . The system of equations (7) is equivalent to  $\sigma_i = H_i(\sigma)$  for all  $i \in \mathcal{N}$ . Suppose there exists two solutions  $\sigma^*$  and  $\sigma'$  such that  $\|\sigma^* - \sigma'\| > 0$ . By mean value inequality (Rudin, 1976), we have

$$\|\sigma^* - \sigma'\| = \|H(\sigma^*) - H(\sigma')\| \leq \|DH(\xi)\| \cdot \|\sigma^* - \sigma'\| \quad (9)$$

where  $\xi \in (0, 1)^n$  and  $DH(\xi)$  is the Jacobian matrix evaluated at  $\xi$ . Since the row vectors of  $DH(\xi)$  are linearly dependent,  $DH(\xi)$  is not invertible and thus  $\|DH(\xi)\| = 0$ . It follows that  $\|\sigma^* - \sigma'\| \leq 0$ . This requires a contradiction. ■

Combining the two lemmas, we reach the conclusion that in any mixed strategy equilibrium with  $m > 1$ , mixing probabilities must be unique and identical across players.

Now (5) implies the best response of any  $i \in \mathcal{M}$ . Any  $i \in V(\mathbf{b})$  has no incentive to deviate since her incentive constraint  $C < d_{R_0} L \mathbb{E}[\pi_{k-1}]$  can be simplified using (5) as

$$\frac{C}{d_{R_0} L} < \sigma^{m-1} \pi_{v+m-2} + (1 - \sigma)^{m-1} \pi_{v-1},$$

which holds under  $\frac{C}{d_{R_0} L} \in (\pi_{v+m-1}, \pi_v)$ . Any  $i \notin V(\mathbf{b})$  has no incentive to deviate since her incentive constraint  $C > d_{R_0} L \mathbb{E}[\pi_{P(\sigma)}]$  can be simplified using (5) as

$$\frac{C}{d_{R_0} L} > \sigma^{m-1} \pi_{v+m} + (1 - \sigma)^{m-1} \pi_{v+1},$$

which again holds under  $\frac{C}{d_{R_0} L} \in (\pi_{v+m-1}, \pi_v)$ . This completes the proof. ■

It follows from the general proposition that there exists a unique totally mixed strategy equilibrium where  $m = n$ .

**Corollary 1.** *There exists a unique totally mixed strategy equilibrium, where  $\sigma_i^* = \sigma^*$  and is implicitly defined by*

$$\frac{1}{d_{R_0} r} = \sum_{k=0}^{v_{crit}} \left(1 - \frac{1}{R_0} - \frac{k}{n}\right) \binom{n}{k} \sigma^{*k} (1 - \sigma^*)^{n-1-k}. \quad (10)$$

## Equilibrium Vaccination Coverage

Let  $\mathcal{P}^*(r, R_0)$  denote the probability distribution over the vaccination coverage induced in the mixed-strategy equilibrium. The following proposition shows that an increase in the relative benefit  $r$  leads to an equilibrium distribution yielding an unambiguously higher vaccination coverage.

**Proposition 4.** *For any  $R_0 > 1$ ,  $\mathcal{P}^*(r, R_0)$  first-order stochastically dominates (FOSD)  $\mathcal{P}^*(r', R_0)$  if and only if  $r > r'$ .*

**Proof of Proposition 4.** Let  $v$  and  $v'$  be the equilibrium number of vaccinated people given the relative benefit  $r$  and  $r'$  respectively. For future use, denote  $F_v(x)$  as the CDF of a random variable  $v$ . We start by working directly with  $\sigma$  as shown in the following lemma.

**Lemma 3.**  *$v$  FOSD  $v'$  if and only if  $\sigma > \sigma'$ .*

**Proof of Lemma 3.**  $v$  FOSD  $v'$  if and only if  $F_v(x) \leq F_{v'}(x)$  for any  $x \in \{1, \dots, n\}$ . Since both  $v$  and  $v'$  follows binomial distribution with  $n$  trials, we remain to show  $\frac{dF_v(x)}{d\sigma} \leq 0$ . Now consider for any  $x$ , the derivative

$$\begin{aligned} \frac{dF_v(x)}{d\sigma} &= \sum_{k=1}^x k \binom{n}{k} \sigma^{k-1} (1-\sigma)^{n-k} - \sum_{k=0}^x (n-k) \binom{n}{k} \sigma^k (1-\sigma)^{n-k-1} \\ &= n \left( \sum_{k=1}^x \binom{n-1}{k-1} \sigma^{k-1} (1-\sigma)^{n-k} - \sum_{k=0}^x \binom{n-1}{k} \sigma^k (1-\sigma)^{n-k-1} \right) \\ &= n (F_{\tilde{v}}(x-1) - F_{\tilde{v}}(x)) \leq 0 \end{aligned}$$

where  $\tilde{v} \sim \text{Bin}(n-1, \sigma)$ . ■

It remains to show that  $\sigma^*$  is monotonically increasing in  $r$ . By implicit function theorem, taking partial derivative of the vaccine uptake likelihood  $\sigma^*(r, R_0)$  with respect to  $r$  gives us

$$\frac{\partial \sigma^*}{\partial r} = 1 / \left[ d_{R_0} r^2 \sum_{k=0}^{v_{crit}} ((n-1)\sigma^* - k) \left(1 - \frac{1}{R_0} - \frac{k}{n}\right) \binom{n}{k} \sigma^{*k-1} (1-\sigma^*)^{n-2-k} \right],$$

which is positive for any  $r > \frac{R_0}{(R_0-1)d_{R_0}}$ .

Therefore,  $v$  FOSD  $v'$  and equivalently,  $P(r, R_0)$  FOSD  $P(r', R_0)$  if and only if  $r > r'$ . ■

The stochastic dominance presented in Proposition 4 implies that  $Pr^*(P \geq P_{crit})$ , the equilibrium probability for the society to achieve the vaccination coverage needed to obtain herd immunity, is monotonically increasing in  $r$  and converges to 1 as  $r$  goes to infinity. By nature of mixed-strategy equilibria, it is impossible to obtain  $Pr^*(P \geq P_{crit}) = 1$  and obliterate an epidemic. However, the society can still

approximate the complete immunity via voluntary vaccination. The following corollary summarizes this discussion.

**Corollary 2.**  $\Pr^*(P \geq P_{crit}) \rightarrow 1$  as  $r \rightarrow \infty$ .

**Proof of Corollary 2.** By Proposition 4,  $\Pr^*(P \geq P_{crit}) = 1 - F_V(v_{crit})$  is monotonically increasing in  $r$ . Furthermore, as  $r \rightarrow \infty$ ,  $\sigma^* \rightarrow 1$ , and  $F_V(v_{crit}) \rightarrow 0$ . ■

We now investigate the role of concavity of the long-run infection probability in facilitating the elimination of an epidemic. Let  $\mathcal{P}^L(r, R_0)$  be the equilibrium vaccination coverage in the linearized environment with  $\pi_P^L = 1 - \frac{1}{R_0} - P$  for any  $P < P_{crit}$ , and  $\pi_P^L = 0$  for any  $P \geq P_{crit}$ . Then we have the following result.

**Proposition 5.** For any  $r > \frac{R_0}{(R_0-1)d_{R_0}}$  and  $R_0 > 1$ ,  $\mathcal{P}^*(r, R_0)$  FOSD  $\mathcal{P}^L(r, R_0)$ .

**Proof of Proposition 5.** By Proposition 3, the totally mixed strategy equilibrium in the linearized environment  $\sigma_i^L = \sigma^L$  is implicitly defined by

$$\frac{1}{d_{R_0}r} = \sum_{k=0}^{v_{crit}} \left(1 - \frac{1}{R_0} - \frac{k}{n}\right) \binom{n-1}{k} \sigma^{Lk} (1 - \sigma^L)^{n-1-k}. \quad (11)$$

By Pascal's rule,  $\binom{n-1}{k} \leq \binom{n}{k}$  for any  $k < n$  and thus  $\sigma^L \leq \sigma^*$ . By lemma 3,  $\mathcal{P}^*(r, R_0)$  FOSD  $\mathcal{P}^L(r, R_0)$ . ■

We now address a comparative static question regarding  $R_0$ . That is, are the players more likely to reach immunity if they are faced with a more threatening epidemic? An exogenous increase in the reproduction ratio  $R_0$  has two competing effects on how easily the society can achieve herd immunity via voluntary vaccination. On the one hand, it raises the long-run probability of infection  $\pi_P$ , meaning that individuals in the mixed-strategy Nash equilibrium are more likely to vaccinate. On the other hand, a higher  $R_0$  also increases the critical level needed for herd immunity  $P_{crit}$ . Figure 1 shows that the first effect dominates the second effect so that it is easier to achieve herd immunity when  $R_0$  is higher. This result is summarized in the following proposition.

**Proposition 6.** For any  $r \in (\frac{R_0}{(R_0-1)d_{R_0}}, +\infty)$ ,  $\mathcal{P}^*(r, R_0)$  FOSD  $\mathcal{P}^*(r, R'_0)$  if and only if  $R_0 > R'_0$ .

**Proof of Proposition 6.** By implicit function theorem, taking partial derivative of the vaccine uptake likelihood  $\sigma^*(r, R_0)$  with respect to  $R_0$  gives us

$$\frac{\partial \sigma^*}{\partial R_0} = \frac{\sum_{k=0}^{v_{crit}} R_0^{-2} \binom{n}{k} \sigma^{*k} (1 - \sigma^*)^{n-1-k} + \frac{d_{R_0}}{d_{R_0}^2} r}{\sum_{k=0}^{v_{crit}} ((n-1)\sigma^* - k) \left(1 - \frac{1}{R_0} - \frac{k}{n}\right) \binom{n}{k} \sigma^{*k-1} (1 - \sigma^*)^{n-2-k}} \quad (12)$$

which is positive for  $r > \frac{R_0}{(R_0-1)d_{R_0}}$ . By lemma 3,  $\mathcal{P}^*(r, R_0)$  FOSD  $\mathcal{P}^*(r, R'_0)$  if and only if  $R_0 > R'_0$ . ■

This result implies that a more contagious disease is unambiguously easier to deal with. A higher  $R_0$  encourages people to get vaccinated voluntarily. Hence, epidemics like Ebola, with substantially low  $R_0$ , are particularly difficult to control based on voluntary vaccination.
